# Supplementary material for: Systematic synthesis and analysis of change in morphology, electronic structure and photoluminescence properties of 2,2′-dipyridyl intercalated MoO3 hybrid nanostructures and investigation of their photocatalytic activity
Source: Royal Society of Chemistry journal article supplement (doi:10.1039/c6ra13558g), 2016-01-01
Supplement: c6ra13558g1.pdf [file c6ra13558g1.pdf]

**Systematic synthesis and analysis of change in morphology, electronic structure and photoluminescence properties of 2, 2'-Dipyridyl intercalated MoO<sub>3</sub> hybrid nanostructures and investigation of their photocatalytic activity**

S. Rajagopal<sup>a, b, \*</sup>, M. Bharaneswari<sup>c</sup>, D. Nataraj<sup>a</sup>, O. Y. Khyzhun<sup>d</sup> and Yahia Djaoued<sup>e</sup>

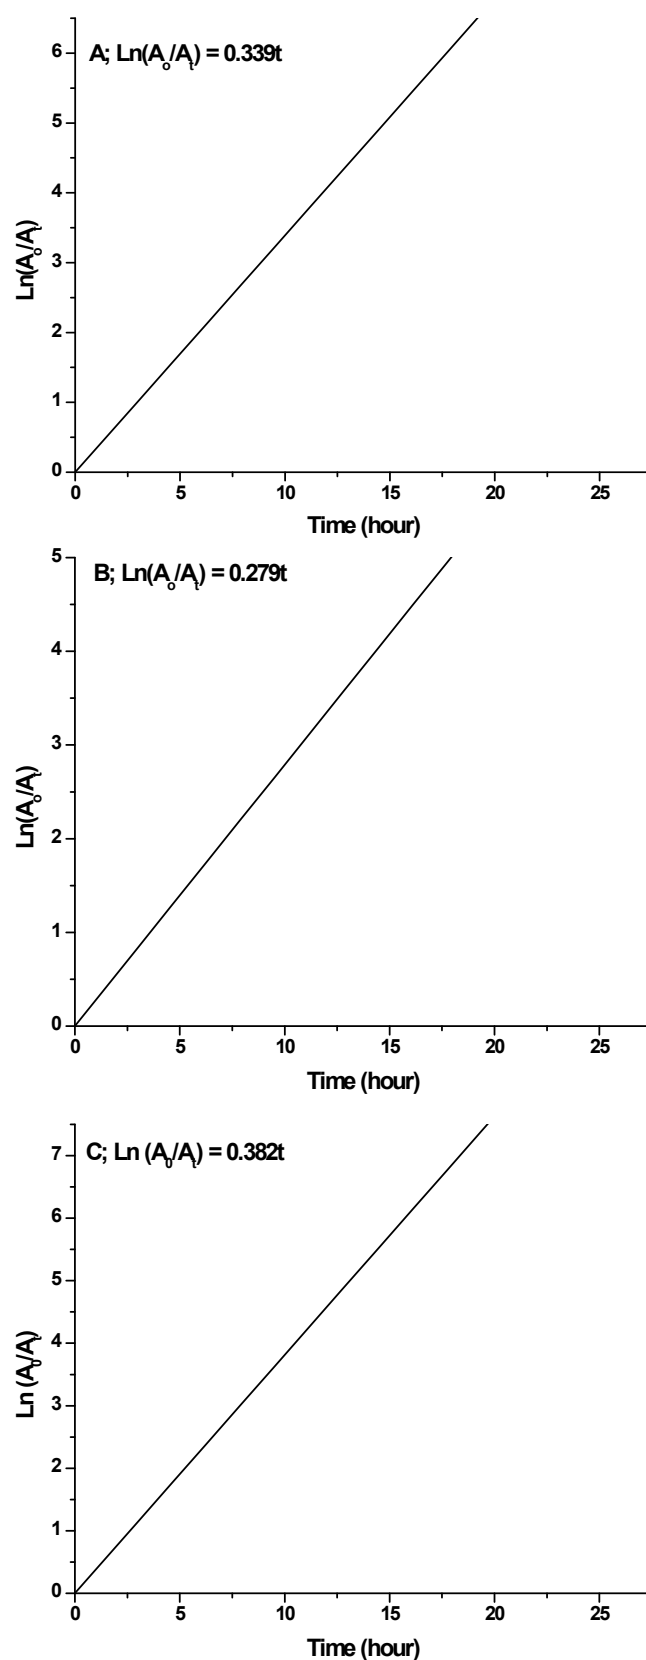

**Fig. S1** Relationship between  $\ln(A_0/A_t)$  and time during the decomposition of Procion Red MX-5B in the presence of MoO<sub>3</sub> nanostructures. (D) Dipyridyl intercalated MoO<sub>3</sub> + Procion dye, and (E) Dipyridyl deintercalated MoO<sub>3</sub> + Procion dye.
